# Supplementary material for: Expression profiles of TRPV1, TRPV4, TLR4 and ERK1/2 in the dorsal root ganglionic neurons of a cancer-induced neuropathy rat model
Source: PeerJ journal article supplement (doi:10.7717/peerj.4622), 2018-04-04

# Expression Profiles of TRPV1, TRPV4, TLR4 and ERK1/2 in the Dorsal Root Ganglionic Neurons of a Cancer-Induced Neuropathy Rat Model

Figure 4:

- Anti-TRPV1 antibody

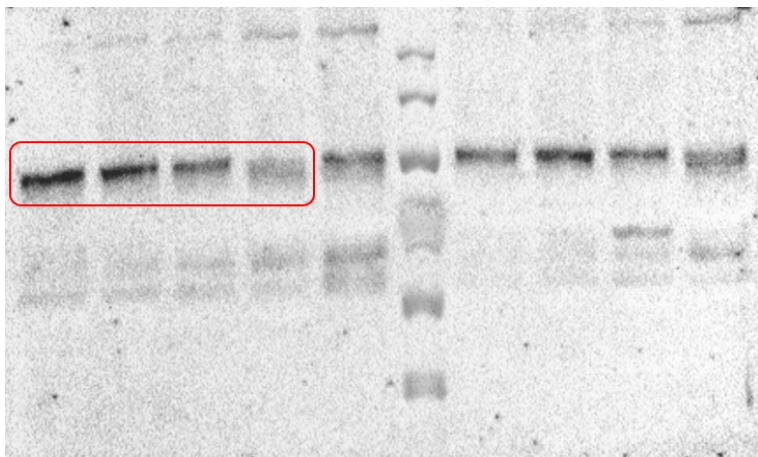

- Anti- $\beta$ -actin antibody

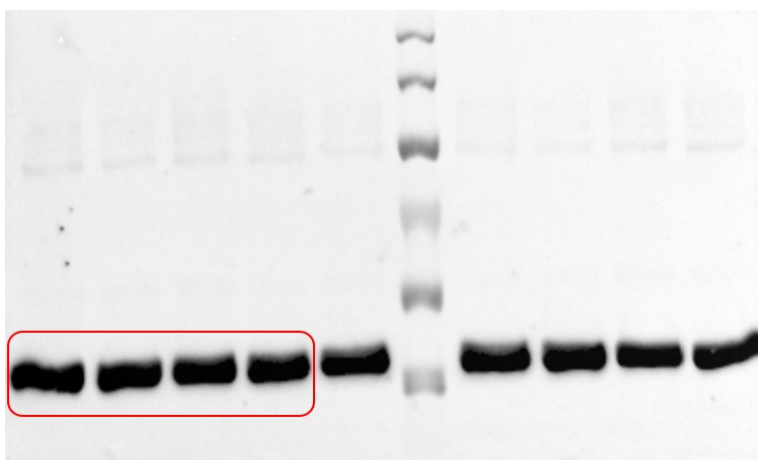

**Figure 7:**

- Anti-TRPV4 antibody

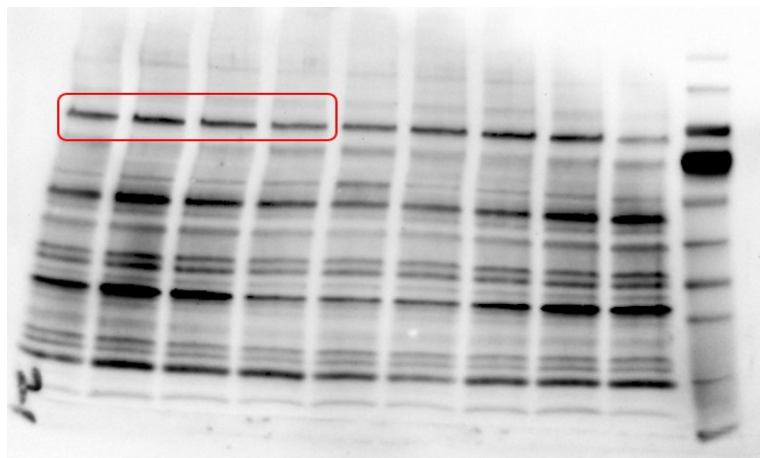

- Anti- $\beta$ -actin antibody

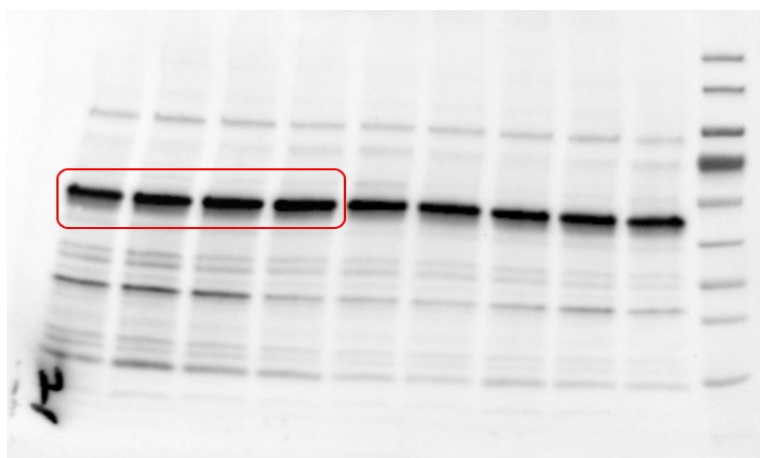

Supplement: MAQBOUL_Supplemental_File.pdf [file MAQBOUL_Supplemental_File.pdf]
